# Supplementary material for: Comparison between dietary assessment methods and biomarkers in estimating dietary (poly)phenol intake
Source: Royal Society of Chemistry journal article supplement (doi:10.1039/d2fo02755k), 2023-01-01
Supplement: d2fo02755k1.pdf [file d2fo02755k1.pdf]

**Supplementary Table 1. Limit of quantifications and inter-/intra-batch coefficient of variance in LC-MS analysis of (poly)phenol metabolites**

| Compound name                   | Recommended name                       | LOQ (nM) | inter-batch precision (CV%) | urine intra-batch (CV%) | plasma intra-batch (CV%) |
|---------------------------------|----------------------------------------|----------|-----------------------------|-------------------------|--------------------------|
| <b>Flavonoids</b>               |                                        |          |                             |                         |                          |
| <b>Flavanols</b>                |                                        |          |                             |                         |                          |
| (-)-Epicatechin                 | (-)-Epicatechin                        | 8.3      | 35.1                        | 16.6                    | 15.4                     |
| (-)-Epicatechin-3'-sulfate      | (-)-Epicatechin-3'-sulfate             | 8.1      | 39.9                        | 13.0                    | 43.6                     |
| <b>Flavanones</b>               |                                        |          |                             |                         |                          |
| Naringenin-4'-glucuronide       | Naringenin-4'-glucuronide              | 8.2      | 36.8                        | 14.8                    | 14.7                     |
| rac-Hesperetin-3'-glucuronide   | rac-Hesperetin-3'-glucuronide          | 8.4      | 42.0                        | 10.8                    | 17.0                     |
| rac-Hesperetin-7-sulfate        | rac-Hesperetin-7-sulfate               | 8.3      | 26.8                        | 15.9                    | 13.0                     |
| Hesperetin                      | Hesperetin                             | 8.3      | 19.8                        | 16.6                    | 14.3                     |
| <b>Flavones</b>                 |                                        |          |                             |                         |                          |
| Flavone                         | Flavone                                | 8.3      | 30.7                        | 16.5                    | 13.0                     |
| <b>Flavonols</b>                |                                        |          |                             |                         |                          |
| Quercetin                       | Quercetin                              | 1.6      | 35.1                        | 16.1                    | 15.2                     |
| Quercetin-3-sulfate             | Quercetin-3-sulfate                    | 8.4      | 15.6                        | 24.6                    | 36.6                     |
| Quercetin-3-glucuronide         | Quercetin-3-glucuronide                | 1.7      | 57.4                        | 20.5                    | 20.1                     |
| Quercetin-7-glucuronide         | Quercetin-7-glucuronide                | 8.4      | 34.5                        | 21.2                    | 15.0                     |
| Kaempferol-3-glucuronide        | Kaempferol-3-glucuronide               | 1.8      | 13.4                        | 10.9                    | 8.9                      |
| <b>Dihydrochalcones</b>         |                                        |          |                             |                         |                          |
| Phloretin                       | Phloretin                              | 16.6     | 15.3                        | 15.5                    | 18.8                     |
| <b>Isoflavonoids</b>            |                                        |          |                             |                         |                          |
| Equol-7-glucuronide             | Equol-7-glucuronide                    | 8.3      | 42.5                        | 8.1                     | 26.9                     |
| Daidzein                        | Daidzein                               | 7.9      | 14.4                        | 12.2                    | 20.6                     |
| <b>Lignans</b>                  |                                        |          |                             |                         |                          |
| Secoisolariciresinol            | Secoisolariciresinol                   | 8.3      | 84.7                        | 36.8                    | 19.4                     |
| Enterodiol                      | Enterodiol                             | 8.3      | 14.6                        | 12.3                    | 15.0                     |
| Enterolactone                   | Enterolactone                          | 8.3      | 12.9                        | 15.6                    | 17.3                     |
| Enterolactone-glucuronide       | Enterolactone-glucuronide              | 8.3      | 53.9                        | 9.5                     | 18.8                     |
| Enterolactone-sulfate           | Enterolactone-sulfate                  | 8.3      | 7.5                         | 15.8                    | 16.2                     |
| <b>Other (poly)phenols</b>      |                                        |          |                             |                         |                          |
| <b>Benzene diols and triols</b> |                                        |          |                             |                         |                          |
| 4-Methylcatechol                | 1,2-Dihydroxy-4-methylbenzene          | 8.4      | 10.1                        | 14.4                    | 34.2                     |
| 4-Methylcatechol-1/2-sulfate    | 2-Hydroxy-4/5-methylbenzene-1-sulfate  | 83.5     | 20.1                        | 9.9                     | 8.3                      |
| Catechol-O-1-glucuronide        | 2-Hydroxybenzene-1-glucuronide         | 8.5      | 36.6                        | 12.2                    | 16.0                     |
| Pyrogallol-1/2-sulfate          | 2,3,2,6-Dihydroxybenzene-1-sulfate     | 1.6      | 11.0                        | 6.6                     | 9.5                      |
| 1-Methylpyrogallol-2/3-sulfate  | 2-Hydroxy-6/3-methoxybenzene-1-sulfate | 16.7     | 9.6                         | 7.7                     | 10.6                     |
| 2-Methylpyrogallol-1-sulfate    | 3-Hydroxy-2-methoxybenzene-1-sulfate   | 8.2      | 12.8                        | 11.8                    | 20.9                     |

| Compound name                     | Recommended name                          | LOQ (nM) | inter-batch precision (CV%) | urine intra-batch (CV%) | plasma intra-batch (CV%) |
|-----------------------------------|-------------------------------------------|----------|-----------------------------|-------------------------|--------------------------|
| <b>Benzaldehydes</b>              |                                           |          |                             |                         |                          |
| 3,4-Dihydroxybenzaldehyde         | 3,4-Dihydroxybenzaldehyde                 | 7.8      | 35.6                        | 10.6                    | 12.0                     |
| 4-Hydroxybenzaldehyde             | 4-Hydroxybenzaldehyde                     | 8.0      | 30.9                        | 9.7                     | 12.6                     |
| Vanillin                          | 4-Hydroxy-3-methoxybenzaldehyde           | 15.7     | 34.8                        | 15.5                    | 19.5                     |
| <b>Hydroxycoumarins</b>           |                                           |          |                             |                         |                          |
| 7,8-Dihydroxycoumarin             | 7,8-Dihydroxycoumarin                     | 8.4      | 21.2                        | 18.3                    | 38.4                     |
| Urolithin B                       | 3-Hydroxy-urolithin                       | 8.6      | 11.0                        | 8.4                     | 15.2                     |
| <b>Tyrosols (C6–C2)</b>           |                                           |          |                             |                         |                          |
| Tyrosol                           | 2-(4'-hydroxyphenyl) ethanol              | 7.3      | 57.4                        | 20.2                    | 17.9                     |
| Tyrosol sulfate                   | Phenylethanol-4'-sulfate                  | 8.0      | 26.8                        | 26.4                    | 25.5                     |
| Hydroxytyrosol                    | 3',4'-Dihydroxyphenylethanol              | 8.2      | 37.2                        | 17.8                    | 30.7                     |
| Hydroxytyrosol-4'-sulfate         | 3'-Hydroxyphenylethanol-4'-sulfate        | 8.3      | 15.3                        | 18.8                    | 16.4                     |
| Hydroxytyrosol-3'-sulfate         | 4'-Hydroxyphenylethanol-3'-sulfate        | 8.5      | 9.8                         | 9.2                     | 24.6                     |
| <b>Phenolic acids</b>             |                                           |          |                             |                         |                          |
| <b>Benzoic acids (C6–C1)</b>      |                                           |          |                             |                         |                          |
| Benzoic acid                      | Benzoic acid                              | 83.9     | 33.5                        | 8.7                     | 17.6                     |
| 2-Hydroxybenzoic acid             | 2-Hydroxybenzoic acid                     | 8.3      | 36.8                        | 12.5                    | 7.7                      |
| 3-Hydroxybenzoic acid             | 3-Hydroxybenzoic acid                     | 16.7     | 35.7                        | 18.7                    | 16.1                     |
| 4-Hydroxybenzoic acid             | 4-Hydroxybenzoic acid                     | 8.3      | 39.4                        | 6.8                     | 10.4                     |
| 2,3-Dihydroxybenzoic acid         | 2,3-Dihydroxybenzoic acid                 | 83.3     | 21.2                        | 10.8                    | 6.0                      |
| 2,4/2,6-Dihydroxybenzoic acid     | 2,4/2,6-Dihydroxybenzoic acid             | 16.9     | 22.1                        | 12.7                    | 25.7                     |
| 2,5-Dihydroxybenzoic acid         | 2,5-Dihydroxybenzoic acid                 | 16.7     | 39.8                        | 10.5                    | 15.0                     |
| 2,6-Dihydroxybenzoic acid         | 2,6-Dihydroxybenzoic acid                 | 9.3      | 20.4                        | 11.2                    | 8.2                      |
| Protocatechuic acid               | 3,4-Dihydroxybenzoic acid                 | 8.3      | 26.0                        | 15.4                    | 29.6                     |
| 3,5-Dihydroxybenzoic acid         | 3,5-Dihydroxybenzoic acid                 | 17.0     | 46.2                        | 7.5                     | 14.4                     |
| 2,3,4-Trihydroxybenzoic acid      | 2,3,4-Trihydroxybenzoic acid              | 8.1      | 13.9                        | 27.8                    | 26.0                     |
| 2-Hydroxy-4-methoxybenzoic acid   | 2-Hydroxy-4-methoxybenzoic acid           | 8.3      | 31.5                        | 8.0                     | 7.3                      |
| Protocatechuic acid-4-sulfate     | 3-Hydroxybenzoic acid-4-sulfate           | 8.3      | 2.8                         | 16.5                    | 13.1                     |
| Protocatechuic acid-3-sulfate     | 4-Hydroxybenzoic acid-3-sulfate           | 8.3      | 15.8                        | 8.0                     | 9.6                      |
| Protocatechuic acid-3-glucuronide | 4-Hydroxybenzoic acid-3-glucuronide       | 8.3      | 35.5                        | 14.2                    | 11.0                     |
| Syringic acid                     | 4-Hydroxy-3,5-dimethoxybenzoic acid       | 1.7      | 49.4                        | 27.7                    | 31.7                     |
| Ethyl-gallate                     | 3,4,5-Trihydroxybenzoic acid ethyl ester  | 2.1      | 21.5                        | 8.4                     | 14.8                     |
| Galic acid                        | 3,4,5-Trihydroxybenzoic acid              | 2.2      | 17.9                        | 20.3                    | 22.9                     |
| 4-Methylgallic acid-3-sulfate     | 3-Hydroxy-4-methoxybenzoic acid-5-sulfate | 8.2      | 31.6                        | 13.2                    | 16.2                     |
| Vanillic acid                     | 4-Hydroxy-3-                              | 8.3      | 66.8                        | 29.5                    | 41.6                     |

| Compound name                  | Recommended name                        | LOQ (nM) | inter-batch precision (CV%) | urine intra-batch (CV%) | plasma intra-batch (CV%) |
|--------------------------------|-----------------------------------------|----------|-----------------------------|-------------------------|--------------------------|
|                                | methoxybenzoic acid                     |          |                             |                         |                          |
| Vanillic acid-4-sulfate        | 3-Methoxybenzoic acid-4-sulfate         | 8.3      | 20.4                        | 9.4                     | 26.9                     |
| Isovanillic acid-3-sulfate     | 4-Methoxybenzoic acid-3-sulfate         | 8.4      | 35.2                        | 9.8                     | 14.5                     |
| Ellagic acid                   | Ellagic acid                            | 8.4      | 22.9                        | 51.4                    | 46.9                     |
| <b>Hippuric acids</b>          |                                         |          |                             |                         |                          |
| Hippuric acid                  | Hippuric acid                           | 166.2    | 18.8                        | 6.2                     | 13.5                     |
| 2'-Hydroxyhippuric acid        | 2'-Hydroxyhippuric acid                 | 1.7      | 24.5                        | 25.2                    | 12.7                     |
| 3'-Hydroxyhippuric acid        | 3'-Hydroxyhippuric acid                 | 8.7      | 46.3                        | 10.7                    | 13.8                     |
| 4'-Hydroxyhippuric acid        | 4'-Hydroxyhippuric acid                 | 7.9      | 33.8                        | 9.9                     | 20.7                     |
| $\alpha$ -hydroxyhippuric acid | $\alpha$ -hydroxyhippuric acid          | 41.9     | 45.0                        | 9.7                     | 12.4                     |
| <b>Cinnamic acids</b>          |                                         |          |                             |                         |                          |
| Cinnamic acid                  | Cinnamic acid                           | 16.5     | 35.8                        | 11.3                    | 7.5                      |
| Caffeic acid                   | 3',4'-Dihydroxycinnamic acid            | 1.8      | 26.5                        | 10.6                    | 18.6                     |
| Caffeic acid-4'-sulfate        | 3'-Hydroxycinnamic acid-4'-sulfate      | 8.3      | 11.9                        | 9.5                     | 12.0                     |
| Caffeic acid-3'-sulfate        | 4'-Hydroxycinnamic acid-3'-sulfate      | 8.3      | 24.1                        | 8.0                     | 10.0                     |
| Caffeic acid-4'-glucuronide    | 3'-Hydroxycinnamic acid-4'-glucuronide  | 1.6      | 11.8                        | 11.6                    | 17.4                     |
| Caffeic acid-3'-glucuronide    | 4'-Hydroxycinnamic acid-3'-glucuronide  | 1.6      | 33.8                        | 13.0                    | 13.7                     |
| trans-Ferulic acid             | 4'-Hydroxy-3'-methoxycinnamic acid      | 16.7     | 18.0                        | 20.9                    | 13.2                     |
| Ferulic acid-4'-sulfate        | 3'-Methoxycinnamic acid-4'-sulfate      | 16.7     | 22.5                        | 11.1                    | 10.7                     |
| Ferulic acid-4'-glucuronide    | 3'-Methoxycinnamic acid-4'-glucuronide  | 8.6      | 43.6                        | 13.1                    | 15.9                     |
| Isoferulic acid                | 3'-Hydroxy-4'-methoxycinnamic acid      | 83.3     | 23.3                        | 12.5                    | 3.9                      |
| Isoferulic acid-3'-sulfate     | 4'-Methoxycinnamic acid-3'-sulfate      | 8.1      | 23.5                        | 13.6                    | 16.8                     |
| Isoferulic acid-3'-glucuronide | 4'-Methoxycinnamic acid-3'-glucuronide  | 8.6      | 41.0                        | 19.2                    | 33.6                     |
| Cryptochlorogenic acid         | 4-O-Caffeoylquinic acid                 | 1.4      | 49.7                        | 22.0                    | 21.4                     |
| Chlorogenic acid               | 5-O-Caffeoylquinic acid                 | 1.7      | 21.0                        | 16.4                    | 8.5                      |
| 3-O-Feruloylquinic acid        | 3-O-Feruloylquinic acid                 | 1.7      | 50.8                        | 12.0                    | 31.3                     |
| 4-O-Feruloylquinic acid        | 4-O-Feruloylquinic acid                 | 1.6      | 51.6                        | 6.5                     | 15.2                     |
| Sinapic acid                   | 4'-Hydroxy-3',5'-dimethoxycinnamic acid | 1.7      | 35.3                        | 7.7                     | 6.6                      |
| m-Coumaric acid                | 3'-Hydroxycinnamic acid                 | 1.5      | 36.6                        | 18.2                    | 24.2                     |
| p-Coumaric acid                | 4'-Hydroxycinnamic acid                 | 1.7      | 28.5                        | 7.1                     | 8.3                      |
| o-Coumaric acid                | 2'-Hydroxycinnamic acid                 | 1.2      | 41.7                        | 20.4                    | 30.0                     |
| p-Coumaric acid-4'-sulfate     | Cinnamic acid-4'-sulfate                | 8.5      | 4.7                         | 6.9                     | 8.9                      |
| p-Coumaric acid-4'-glucuronide | Cinnamic acid-4'-glucuronide            | 8.3      | 35.0                        | 11.8                    | 9.4                      |
| <b>Phenylacetic acids</b>      |                                         |          |                             |                         |                          |
| Phenylacetic acid              | Phenylacetic acid                       | 166.1    | 39.3                        | 21.1                    | 35.0                     |
| Homoprotocatechuic acid        | 3',4'-Dihydroxyphenylacetic             | 16.6     | 33.6                        | 14.8                    | 18.9                     |

| Compound name                                                 | Recommended name                                                   | LOQ (nM) | inter-batch precision (CV%) | urine intra-batch (CV%) | plasma intra-batch (CV%) |
|---------------------------------------------------------------|--------------------------------------------------------------------|----------|-----------------------------|-------------------------|--------------------------|
|                                                               | acid                                                               |          |                             |                         |                          |
| Homovanillic acid-sulfate                                     | 3'-Methoxyphenylacetic acid-4'-sulfate                             | 1.6      | 81.5                        | 18.0                    | 14.5                     |
| <b>Phenylpropanoic acids</b>                                  |                                                                    |          |                             |                         |                          |
| 2-(4'-Hydroxyphenoxy) propanoic acid                          | 2-(4'-Hydroxyphenoxy) propanoic acid                               | 16.6     | 23.4                        | 5.8                     | 11.4                     |
| 3-(2'-Hydroxyphenyl) propanoic acid                           | 3-(2'-Hydroxyphenyl) propanoic acid                                | 8.0      | 39.7                        | 7.4                     | 8.0                      |
| 3-(3'-Hydroxyphenyl) propanoic acid                           | 3-(3'-Hydroxyphenyl) propanoic acid                                | 8.5      | 20.7                        | 15.9                    | 30.0                     |
| 3-(2',3'-Dihydroxyphenyl) propanoic acid                      | 3-(2',3'-Dihydroxyphenyl) propanoic acid                           | 7.5      | 23.9                        | 9.1                     | 16.3                     |
| 3-(2',4'-Dihydroxyphenyl) propanoic acid                      | 3-(2',4'-Dihydroxyphenyl) propanoic acid                           | 9.4      | 27.0                        | 10.5                    | 12.5                     |
| Dihydrocaffeic acid                                           | 3-(3',4'-Dihydroxyphenyl) propanoic acid                           | 8.3      | 46.5                        | 9.7                     | 10.0                     |
| 3-(3',5'-Dihydroxyphenyl) propanoic acid                      | 3-(3',5'-Dihydroxyphenyl) propanoic acid                           | 9.7      | 17.4                        | 7.4                     | 11.0                     |
| 2-Hydroxy-3-(4'-hydroxyphenyl)propanoic acid                  | 2-Hydroxy-3-(4'-hydroxyphenyl)propanoic acid                       | 9.4      | 39.8                        | 8.3                     | 10.9                     |
| Dihydrocaffeic acid-3'-glucuronide                            | 3-(4'-Hydroxyphenyl) propanoic acid-3'-glucuronide                 | 16.7     | 34.8                        | 15.7                    | 12.2                     |
| Dihydrocaffeic acid-3'-sulfate                                | 3-(4'-Hydroxyphenyl) propanoic acid-3'-sulfate                     | 8.4      | 67.8                        | 12.1                    | 17.3                     |
| Dihydroferulic acid-4'-glucuronide                            | 3-(3'-Methoxyphenyl) propanoic acid-4'-glucuronide                 | 1.8      | 31.3                        | 14.5                    | 15.3                     |
| Dihydroferulic acid-4'-sulfate                                | 3-(3'-Methoxyphenyl) propanoic acid-4'-sulfate                     | 1.6      | 43.8                        | 11.7                    | 38.7                     |
| Dihydroisoferulic acid-3'-glucuronide                         | 3-(4'-Methoxyphenyl) propanoic acid-3'-glucuronide                 | 1.6      | 43.6                        | 7.3                     | 6.7                      |
| Dihydroisoferulic acid-3'-sulfate                             | 3-(4'-Methoxyphenyl) propanoic acid-3'-sulfate                     | 1.6      | 32.8                        | 12.7                    | 24.1                     |
| <b>Phenyl-<math>\gamma</math>-valerolactones</b>              |                                                                    |          |                             |                         |                          |
| (4R)-5-(3'-hydroxyphenyl)- $\gamma$ -valerolactone-4'-sulfate | (4R)-5-(3',4'-dihydroxyphenyl)- $\gamma$ -valerolactone-4'-sulfate | 8.3      | 14.8                        | 8.2                     | 8.6                      |
| <b>Stilbenes</b>                                              |                                                                    |          |                             |                         |                          |
| Dihydroresveratrol                                            | Dihydroresveratrol                                                 | 8.4      | 32.9                        | 10.9                    | 9.8                      |
| trans-Resveratrol 4'-glucuronide                              | trans-Resveratrol 4'-glucuronide                                   | 8.3      | 22.1                        | 12.8                    | 37.5                     |
| trans-Resveratrol 3-glucuronide                               | trans-Resveratrol 3-glucuronide                                    | 8.3      | 52.5                        | 16.2                    | 30.2                     |
| cis-Resveratrol 4'-glucuronide                                | cis-Resveratrol 4'-glucuronide                                     | 8.3      | 17.8                        | 18.2                    | 28.4                     |
| trans-Resveratrol 3-Sulfate                                   | trans-Resveratrol 3-Sulfate                                        | 8.4      | 23.5                        | 5.4                     | 13.4                     |
| <b>Internal standard</b>                                      |                                                                    |          |                             |                         |                          |
| Taxifolin                                                     | Taxifolin                                                          | -        | -                           | -                       | -                        |

**Supplementary Table 2. Nutrients and food groups intake of the study population estimated from FFQ and 7-day food diaries (n=413)**

| Nutrients and food groups | FFQ         |             |             | 7DD            |                |               |
|---------------------------|-------------|-------------|-------------|----------------|----------------|---------------|
|                           | Total       | Men         | Women       | Total          | Men            | Women         |
| Energy (kcal/d)           | 1746 (785)  | 1742 (614)  | 1749 (899)  | 2031 (923) a   | 2339 (1213) a  | 1789 (482) b  |
| Protein (g/d)             | 81 (38)     | 81 (30)     | 81 (44)     | 89 (39) a      | 103 (50) a     | 188 (55)      |
| Total carbohydrates (g/d) | 199 (92)    | 201 (72)    | 198 (105)   | 214 (109) a    | 247 (146) a    | 75 (28)       |
| Sugars (g/d)              | 95 (48)     | 95 (44)     | 95 (51)     | 84 (53) a      | 93 (72) b      | 78 (28) a     |
| Total fat (g/d)           | 71 (40)     | 70 (33)     | 72 (44)     | 85 (45) a      | 96 (58) a      | 75 (28) b     |
| MUFA (g/d)                | 27 (17)     | 27 (13)     | 28 (19)     | 32 (17) a      | 36 (22) a      | 28 (11)       |
| PUFA (g/d)                | 13 (9)      | 12 (6)      | 14 (10)     | 15 (14) b      | 17 (19) a      | 13 (8)        |
| SFA (g/d)                 | 25 (14)     | 25 (13)     | 24 (14)     | 28 (14) a      | 32 (16) a      | 25 (10) b     |
| Cholesterol (g/d)         | 286 (181)   | 304 (189)   | 272 (174)   | 272 (163)      | 325 (201)      | 230 (108) b   |
| Fibre (g/d) *             | 17 (11)     | 16 (7)      | 19 (12)     | 17 (9)         | 18 (12) b      | 16 (7) b      |
| Vitamin A (µg/d) **       | 1136 (866)  | 1010 (561)  | 1235 (1036) | 1190 (2569) b  | 1350 (3711)    | 1064 (972) b  |
| Retinol (µg/d)            | 463 (486)   | 447 (384)   | 476 (554)   | 392 (771) a    | 394 (677) b    | 391 (839) b   |
| Alpha carotene (µg/d)     | 470 (524)   | 419 (405)   | 510 (600)   | 609 (1242)     | 616 (1579)     | 604 (896)     |
| Beta carotene (µg/d)      | 3601 (3618) | 2978 (1904) | 4092 (4477) | 3167 (3017) b  | 2978 (3339)    | 3316 (2736) b |
| Vitamin D (µg/d)          | 3 (3)       | 3 (3)       | 3 (2)       | 4 (6)          | 4 (3)          | 4 (7)         |
| Vitamin E (µg/d)          | 12 (7)      | 11 (5)      | 13 (8)      | 12 (11)        | 12 (13)        | 11 (8) a      |
| Vitamin B1 (mg/d)         | 1 (1)       | 1 (1)       | 2 (1)       | 2 (6) a        | 2 (6) a        | 2 (6)         |
| Vitamin B2 (mg/d)         | 2 (1)       | 2 (1)       | 2 (1)       | 3 (22)         | 4 (21) b       | 3 (23) a      |
| Niacin (mg/d)             | 22 (11)     | 22 (9)      | 22 (12)     | 41 (18) a      | 48 (22) a      | 35 (11) a     |
| Vitamin B6 (mg/d)         | 2 (1)       | 2 (1)       | 2 (1)       | 3 (13) a       | 4 (19)         | 2 (5) a       |
| Folate (µg/d)             | 290 (172)   | 266 (105)   | 308 (209)   | 286 (118)      | 306 (139) a    | 270 (95) b    |
| Vitamin B12 (µg/d)        | 6 (4)       | 7 (5)       | 6 (4)       | 6 (15) a       | 8 (20)         | 6 (9) a       |
| Vitamin C (mg/d)          | 115 (99)    | 99 (58)     | 128 (121)   | 119 (211)      | 116 (249)      | 121 (176) b   |
| Sodium (mg/d)             | 2413 (1113) | 2402 (1105) | 2422 (1122) | 3072 (9292) b  | 4489 (13859) b | 1955 (824) a  |
| Potassium (mg/d)          | 3389 (1512) | 3244 (1136) | 3502 (1746) | 3334 (2015)    | 3688 (2804) b  | 3055 (954) b  |
| Calcium (mg/d)            | 853 (421)   | 829 (329)   | 872 (481)   | 913 (522) b    | 1036 (689) a   | 815 (304)     |
| Magnesium (mg/d)          | 320 (147)   | 301 (103)   | 335 (173)   | 379 (307) a    | 416 (397) a    | 350 (206)     |
| Phosphorus (mg/d)         | 1360 (571)  | 1341 (445)  | 1375 (655)  | 1422 (690) b   | 1614 (901) a   | 1271 (402)    |
| Iron (mg/d)               | 11 (5)      | 11 (4)      | 12 (6)      | 18 (83) a      | 27 (124) a     | 12 (6)        |
| Copper (mg/d)             | 1 (1)       | 1 (0)       | 1 (1)       | 2 (2) a        | 2 (2) a        | 2 (2) a       |
| Zinc (mg/d)               | 9 (4)       | 9 (3)       | 9 (5)       | 44 (364) a     | 42 (408) a     | 46 (326)      |
| Chloride (mg/d)           | 3608 (1634) | 3582 (1592) | 3629 (1670) | 4542 (14124) b | 6698 (21069) b | 2843 (1187) a |
| Manganese (mg/d)          | 4 (2)       | 3 (1)       | 4 (2)       | 7 (18) a       | 9 (24) a       | 5 (10) a      |
| Selenium (µg/d)           | 64 (33)     | 63 (28)     | 64 (37)     | 69 (193) b     | 66 (36)        | 72 (256) a    |
| Iodine (µg/d)             | 138 (65)    | 137 (62)    | 138 (68)    | 167 (475)      | 144 (83)       | 186 (631)     |
| Fruits (g/d)              | 268 (248)   | 228 (197)   | 298 (278)   | 164 (139) a    | 137 (134) a    | 184 (139) a   |
| Vegetables (g/d) ***      | 299 (301)   | 246 (141)   | 341 (377)   | 160 (105) a    | 138 (102) a    | 178 (104) a   |
| Potatoes (g/d)            | 52 (43)     | 58 (42)     | 47 (44)     | 108 (91) a     | 118 (115) a    | 100 (67) a    |

\*: Englyst fibre, non-starch polysaccharides (NSP), \*\*: Retinol equivalents, \*\*\*: Vegetables not including potatoes and other tubers. MUFA: monounsaturated fatty acids, PUFA: polyunsaturated fatty acids, SFA: saturated fatty acids. a:  $p < 0.001$ , b:  $0.05 < p \leq 0.001$ .

**Supplementary Table 3. Agreements between energy adjusted (poly)phenol intakes estimated from FFQ and 7-day food diaries**

| (Poly)phenols*                                  | ICC-A | (95% CI)      | ICC-C | (95% CI)      | Kappa | (95% CI)      | Same quartile (%) | Opposite quartile (%) | Spearman's Rho    |
|-------------------------------------------------|-------|---------------|-------|---------------|-------|---------------|-------------------|-----------------------|-------------------|
| <b>Total (poly)phenols</b>                      | 0.59  | (0.52, 0.65)  | 0.59  | (0.52, 0.65)  | 0.44  | (0.38, 0.50)  | 76.03             | 2.89                  | 0.64 <sup>a</sup> |
| <b>Total Flavonoids</b>                         | 0.53  | (0.46, 0.60)  | 0.53  | (0.46, 0.60)  | 0.41  | (0.35, 0.47)  | 73.55             | 4.13                  | 0.58 <sup>a</sup> |
| <b>Anthocyanins</b>                             | 0.04  | (-0.06, 0.13) | 0.04  | (-0.06, 0.13) | 0.20  | (0.13, 0.27)  | 60.33             | 13.64                 | 0.28 <sup>a</sup> |
| <b>Chalcones</b>                                | 0.07  | (-0.03, 0.16) | 0.07  | (-0.03, 0.16) | 0.13  | (0.06, 0.20)  | 52.89             | 16.53                 | 0.19 <sup>a</sup> |
| <b>Dihydroflavonols</b>                         | 0.07  | (-0.03, 0.16) | 0.07  | (-0.03, 0.16) | 0.41  | (0.35, 0.47)  | 73.14             | 5.79                  | 0.58 <sup>a</sup> |
| <b>Dihydrochalcones</b>                         | 0.37  | (0.28, 0.45)  | 0.37  | (0.28, 0.45)  | 0.31  | (0.24, 0.38)  | 65.70             | 7.85                  | 0.45 <sup>a</sup> |
| <b>Total flavan-3-ols</b>                       | 0.56  | (0.49, 0.62)  | 0.56  | (0.49, 0.62)  | 0.41  | (0.35, 0.47)  | 73.14             | 4.96                  | 0.61 <sup>a</sup> |
| Flavan-3-ol monomers                            | 0.59  | (0.53, 0.65)  | 0.59  | (0.53, 0.65)  | 0.45  | (0.39, 0.51)  | 78.51             | 5.37                  | 0.61 <sup>a</sup> |
| Theaflavins                                     | 0.47  | (0.39, 0.54)  | 0.47  | (0.39, 0.54)  | 0.28  | (0.21, 0.34)  | 57.85             | 4.96                  | 0.43 <sup>a</sup> |
| Thearubigins                                    | 0.47  | (0.39, 0.54)  | 0.47  | (0.39, 0.54)  | 0.36  | (0.29, 0.42)  | 65.70             | 1.65                  | 0.53 <sup>a</sup> |
| Proanthocyanidins                               | 0.30  | (0.20, 0.38)  | 0.29  | (0.20, 0.38)  | 0.27  | (0.20, 0.34)  | 59.92             | 8.68                  | 0.41 <sup>a</sup> |
| <b>Flavanones</b>                               | 0.25  | (0.16, 0.34)  | 0.25  | (0.16, 0.34)  | 0.29  | (0.22, 0.35)  | 61.57             | 6.20                  | 0.40 <sup>a</sup> |
| <b>Flavones</b>                                 | 0.00  | (-0.09, 0.10) | 0.00  | (-0.09, 0.10) | 0.09  | (0.02, 0.16)  | 46.69             | 16.53                 | 0.16 <sup>b</sup> |
| <b>Flavonols</b>                                | 0.14  | (0.04, 0.23)  | 0.14  | (0.04, 0.23)  | 0.14  | (0.07, 0.21)  | 47.93             | 14.05                 | 0.21 <sup>a</sup> |
| <b>Isoflavonoids</b>                            | 0.23  | (0.13, 0.32)  | 0.23  | (0.13, 0.32)  | 0.20  | (0.13, 0.27)  | 61.98             | 14.88                 | 0.28 <sup>a</sup> |
| <b>Total Phenolic acids</b>                     | 0.61  | (0.54, 0.67)  | 0.61  | (0.54, 0.67)  | 0.49  | (0.43, 0.55)  | 86.36             | 3.31                  | 0.65 <sup>a</sup> |
| <b>Hydroxybenzoic acids</b>                     | 0.47  | (0.40, 0.55)  | 0.47  | (0.39, 0.54)  | 0.39  | (0.33, 0.46)  | 72.31             | 4.13                  | 0.59 <sup>a</sup> |
| Ellagitannins                                   | 0.09  | (0.00, 0.19)  | 0.09  | (0.00, 0.19)  | 0.05  | (-0.02, 0.12) | 45.04             | 16.53                 | 0.11 <sup>c</sup> |
| <b>Hydroxycinnamic acids</b>                    | 0.61  | (0.54, 0.66)  | 0.60  | (0.54, 0.66)  | 0.49  | (0.43, 0.55)  | 86.36             | 2.89                  | 0.65 <sup>a</sup> |
| <b>Hydroxyphenylacetic acids</b>                | 0.00  | (-0.10, 0.10) | 0.00  | (-0.09, 0.10) | 0.17  | (0.10, 0.24)  | 54.96             | 14.46                 | 0.21 <sup>a</sup> |
| <b>Hydroxyphenylpropanoic acids<sup>§</sup></b> | 0.00  | (-0.10, 0.10) | -     | -             | -     | -             | -                 | -                     | -                 |
| <b>Total Stilbenes</b>                          | 0.10  | (0.00, 0.19)  | 0.10  | (0.00, 0.19)  | 0.42  | (0.35, 0.48)  | 76.45             | 5.37                  | 0.57 <sup>a</sup> |
| <b>Total Lignans</b>                            | 0.00  | (-0.10, 0.10) | 0.00  | (-0.10, 0.10) | 0.11  | (0.04, 0.18)  | 50.83             | 15.70                 | 0.17 <sup>a</sup> |
| <b>Other (poly)phenols</b>                      | 0.06  | (-0.03, 0.16) | 0.06  | (-0.03, 0.16) | 0.24  | (0.17, 0.31)  | 59.50             | 10.33                 | 0.37 <sup>a</sup> |
| <b>Tyrosols</b>                                 | 0.01  | (-0.09, 0.11) | 0.01  | (-0.09, 0.11) | 0.21  | (0.14, 0.28)  | 57.85             | 13.22                 | 0.28 <sup>a</sup> |
| <b>Alkylmethoxyphenols</b>                      | 0.61  | (0.54, 0.66)  | 0.61  | (0.54, 0.66)  | 0.48  | (0.42, 0.54)  | 84.71             | 3.72                  | 0.62 <sup>a</sup> |
| <b>Alkylphenols</b>                             | 0.23  | (0.14, 0.32)  | 0.23  | (0.14, 0.32)  | 0.31  | (0.24, 0.38)  | 70.66             | 8.26                  | 0.41 <sup>a</sup> |

ICC-C: Intraclass correlation coefficient-Consistency model: when systematic difference between FFQ and 7-day food record estimated (poly)phenol intakes were not relevant. ICC-A: Intraclass correlation coefficient-Agreement model: when systematic difference between FFQ and 7-day food record estimated (poly)phenol intakes were relevant. Kappa: Weighted kappa coefficient (linear weights). 95% CI: 95% confidence interval. \*: (Poly)phenol intakes were all adjusted for energy intake by residual method. a:  $p < 0.001$ , b:  $p = 0.001$ , c:  $p = 0.028$ . §: There was no reported value from FFQ for hydroxyphenylpropanoic acids, so only agreement on the absolute estimated values was assessed.

**Supplementary Table 4. Comparisons of (poly)phenol intake classes and subclasses estimated from FFQ and 7-day food records (mg/d) in participants with plausible reported energy intakes (n=242)**

| (Poly)phenols                       | FFQ             |                 |       | 7DD            |                   |       |
|-------------------------------------|-----------------|-----------------|-------|----------------|-------------------|-------|
|                                     | Mean (SD)       | Median (IQR)    | %     | Mean (SD)      | Median (IQR)      | %     |
| <b>Total (poly)phenols</b>          | 1638.7 (1026.8) | 1648.7 (1419.6) | 100.0 | 1388.2 (914.2) | 1223.3 (1276.5) a | 100.0 |
| <b>Total Flavonoids</b>             | 740.4 (573.8)   | 513.7 (695.7)   | 45.2  | 593.2 (560.7)  | 446.5 (475.4) a   | 42.7  |
| <b>Anthocyanins</b>                 | 8.8 (8.7)       | 6.8 (7.3)       | 0.5   | 34.0 (59.5)    | 19.8 (34.0) a     | 2.4   |
| <b>Chalcones</b>                    | 0.0 (0.0)       | 0.0 (0.0)       | 0.0   | 0.0 (0.0)      | 0.0 (0.0) a       | 0.0   |
| <b>Dihydroflavonols</b>             | 0.1 (0.1)       | 0.0 (0.1)       | 0.0   | 0.9 (1.7)      | 0.0 (1.0) a       | 0.1   |
| <b>Dihydrochalcones</b>             | 3.0 (4.1)       | 2.2 (3.2)       | 0.2   | 1.9 (2.4)      | 1.0 (3.0) a       | 0.1   |
| <b>Total flavan-3-ols</b>           | 626.0 (543.3)   | 396.8 (696.6)   | 38.2  | 479.3 (543.3)  | 337.4 (436.7) a   | 34.5  |
| Flavan-3-ol monomers                | 167.2 (160.3)   | 104.4 (228.7)   | 10.2  | 158.7 (202.1)  | 74.3 (218.6)      | 11.4  |
| Theaflavins                         | 37.9 (39.6)     | 23.6 (55.8)     | 2.3   | 17.6 (40.7)    | 0.0 (14.0) a      | 1.3   |
| Thearubiginins                      | 247.5 (258.5)   | 154.5 (364.5)   | 15.1  | 115.8 (265.8)  | 4.8 (91.8) a      | 8.3   |
| Proanthocyanidins                   | 173.5 (156.0)   | 135.5 (108.1)   | 10.6  | 187.3 (163.6)  | 149.9 (144.1)     | 13.5  |
| <b>Flavanones</b>                   | 34.2 (43.2)     | 23.6 (36.6)     | 2.1   | 14.9 (27.4)    | 4.2 (13.1) a      | 1.1   |
| <b>Flavones</b>                     | 4.5 (2.9)       | 3.8 (2.8)       | 0.3   | 11.6 (22.0)    | 7.2 (7.6) a       | 0.8   |
| <b>Flavonols</b>                    | 55.7 (39.2)     | 46.9 (34.2)     | 3.4   | 48.7 (31.6)    | 41.2 (39.3)       | 3.5   |
| <b>Isoflavonoids</b>                | 8.2 (20.3)      | 1.4 (5.0)       | 0.5   | 3.3 (10.5)     | 0.3 (1.8) a       | 0.2   |
| <b>Total Phenolic acids</b>         | 829.1 (726.0)   | 635.7 (1169.7)  | 50.6  | 700.5 (648.0)  | 560.4 (780.7) a   | 50.5  |
| <b>Hydroxybenzoic acids</b>         | 69.0 (57.8)     | 46.8 (74.0)     | 4.2   | 57.0 (58.8)    | 42.9 (56.0) a     | 4.1   |
| Ellagitannins                       | 3.9 (6.0)       | 1.5 (3.8)       | 0.2   | 3.0 (7.6)      | 0.0 (0.9) a       | 0.2   |
| <b>Hydroxycinnamic acids</b>        | 760.1 (720.5)   | 578.0 (1192.9)  | 46.4  | 641.4 (644.2)  | 499.0 (764.7) b   | 46.2  |
| <b>Hydroxyphenylacetic acids</b>    | 0.0 (0.1)       | 0.0 (0.0)       | 0.0   | 1.0 (2.7)      | 0.1 (0.6) a       | 0.1   |
| <b>Hydroxyphenylpropanoic acids</b> | 0.0 (0.0)       | 0.0 (0.0)       | 0.0   | 0.1 (0.4)      | 0.0 (0.1) a       | 0.0   |
| <b>Total Stilbenes</b>              | 0.1 (0.2)       | 0.1 (0.1)       | 0.0   | 0.8 (1.3)      | 0.1 (1.0) a       | 0.1   |
| <b>Total Lignans</b>                | 44.4 (30.5)     | 37.8 (34.4)     | 2.7   | 43.7 (38.6)    | 35.6 (46.6)       | 3.1   |
| <b>Other (poly)phenols</b>          | 24.6 (31.5)     | 16.7 (17.2)     | 1.5   | 51.0 (90.2)    | 30.4 (36.1) a     | 3.7   |
| Tyrosols                            | 0.7 (0.9)       | 0.4 (1.0)       | 0.0   | 6.4 (10.1)     | 3.3 (6.9) a       | 0.5   |
| Alkylmethoxyphenols                 | 2.6 (2.5)       | 1.8 (4.1)       | 0.2   | 2.2 (2.4)      | 1.7 (3.0) a       | 0.2   |
| Alkylphenols                        | 18.3 (31.0)     | 9.9 (12.5)      | 1.1   | 23.3 (35.4)    | 11.8 (20.8)       | 1.7   |

7DD: 7-day food diary, BMI: body mass index, FFQ: food frequency questionnaire, IQR: inter-quartile range, SD: standard deviation. %: percentage of contribution to the total (poly)phenol intake. Significant values were from paired-sample Wilcoxon signed-rank test. a:  $p < 0.001$ , b:  $p = 0.002$ .

**Supplementary Table 5. Agreements between (poly)phenol intake estimated from FFQ and 7-day food diaries in participants with plausible reported energy intakes (n=242)**

| (Poly)phenols                        | ICC-A | (95% CI)      | ICC-C | (95% CI)      | Kappa | (95% CI)      | Same quartile (%) | Opposite quartile (%) | Spearman's Rho |
|--------------------------------------|-------|---------------|-------|---------------|-------|---------------|-------------------|-----------------------|----------------|
| <b>Total (poly)phenols</b>           | 0.55  | (0.44, 0.64)  | 0.56  | (0.47, 0.64)  | 0.48  | (0.41, 0.56)  | 48.35             | 2.07                  | 0.63 a         |
| <b>Total Flavonoids</b>              | 0.49  | (0.38, 0.58)  | 0.50  | (0.40, 0.59)  | 0.39  | (0.31, 0.48)  | 42.98             | 2.89                  | 0.54 a         |
| <b>Anthocyanins</b>                  | 0.02  | (-0.08, 0.13) | 0.03  | (-0.10, 0.15) | 0.19  | (0.10, 0.29)  | 35.12             | 6.61                  | 0.26 a         |
| <b>Chalcones</b>                     | 0.13  | (0.00, 0.25)  | 0.13  | (0.00, 0.25)  | 0.11  | (0.01, 0.20)  | 30.17             | 9.50                  | 0.23 a         |
| <b>Dihydroflavonols</b>              | 0.06  | (-0.05, 0.16) | 0.07  | (-0.06, 0.19) | 0.51  | (0.43, 0.59)  | 52.89             | 2.48                  | 0.67 a         |
| <b>Dihydrochalcones</b>              | 0.31  | (0.18, 0.42)  | 0.32  | (0.20, 0.43)  | 0.30  | (0.21, 0.39)  | 39.67             | 4.96                  | 0.44 a         |
| <b>Total flavan-3-ols</b>            | 0.52  | (0.41, 0.61)  | 0.54  | (0.44, 0.62)  | 0.41  | (0.33, 0.49)  | 42.15             | 2.07                  | 0.57 a         |
| Flavan-3-ol monomers                 | 0.56  | (0.46, 0.64)  | 0.56  | (0.46, 0.64)  | 0.40  | (0.32, 0.49)  | 43.80             | 2.89                  | 0.57 a         |
| Theaflavins                          | 0.40  | (0.22, 0.54)  | 0.45  | (0.34, 0.55)  | 0.20  | (0.11, 0.29)  | 31.82             | 3.72                  | 0.39 a         |
| Thearubigins                         | 0.40  | (0.23, 0.54)  | 0.45  | (0.35, 0.55)  | 0.23  | (0.15, 0.32)  | 29.75             | 2.89                  | 0.49 a         |
| Proanthocyanidins                    | 0.31  | (0.19, 0.42)  | 0.31  | (0.19, 0.42)  | 0.32  | (0.23, 0.41)  | 40.08             | 4.96                  | 0.44 a         |
| <b>Flavanones</b>                    | 0.26  | (0.12, 0.39)  | 0.30  | (0.18, 0.41)  | 0.29  | (0.21, 0.38)  | 35.12             | 2.48                  | 0.47 a         |
| <b>Flavones</b>                      | -0.01 | (-0.12, 0.11) | -0.01 | (-0.13, 0.12) | 0.03  | (-0.06, 0.12) | 26.45             | 11.98                 | 0.07           |
| <b>Flavonols</b>                     | 0.17  | (0.05, 0.29)  | 0.18  | (0.05, 0.30)  | 0.16  | (0.07, 0.25)  | 30.17             | 5.37                  | 0.29 a         |
| <b>Isoflavonoids</b>                 | 0.16  | (0.03, 0.27)  | 0.16  | (0.04, 0.28)  | 0.19  | (0.10, 0.28)  | 34.30             | 7.44                  | 0.27 a         |
| <b>Total Phenolic acids</b>          | 0.60  | (0.50, 0.67)  | 0.60  | (0.52, 0.68)  | 0.44  | (0.36, 0.52)  | 43.39             | 2.89                  | 0.64 a         |
| <b>Hydroxybenzoic acids</b>          | 0.47  | (0.37, 0.57)  | 0.48  | (0.38, 0.57)  | 0.39  | (0.31, 0.47)  | 41.74             | 2.89                  | 0.56 a         |
| Ellagitannins                        | 0.20  | (0.08, 0.32)  | 0.20  | (0.08, 0.32)  | 0.16  | (0.07, 0.25)  | 31.82             | 7.02                  | 0.32 a         |
| <b>Hydroxycinnamic acids</b>         | 0.59  | (0.50, 0.67)  | 0.60  | (0.52, 0.68)  | 0.46  | (0.38, 0.54)  | 47.93             | 2.48                  | 0.63 a         |
| <b>Hydroxyphenylacetic acids</b>     | 0.00  | (-0.11, 0.12) | 0.01  | (-0.12, 0.13) | 0.19  | (0.11, 0.28)  | 30.17             | 7.85                  | 0.31 a         |
| <b>Hydroxyphenylpropanoic acids*</b> | 0.00  | (-0.11, 0.11) | -     | -             | -     | -             | -                 | -                     | -              |
| <b>Total Stilbenes</b>               | 0.08  | (-0.03, 0.19) | 0.10  | (-0.03, 0.22) | 0.42  | (0.34, 0.51)  | 44.63             | 2.48                  | 0.60 a         |
| <b>Total Lignans</b>                 | 0.00  | (-0.11, 0.11) | 0.00  | (-0.13, 0.12) | 0.09  | (0.00, 0.19)  | 30.99             | 11.57                 | 0.12           |
| <b>Other (poly)phenols</b>           | 0.07  | (-0.04, 0.19) | 0.08  | (-0.05, 0.20) | 0.29  | (0.20, 0.37)  | 37.60             | 4.13                  | 0.39 a         |
| <b>Tyrosols</b>                      | 0.01  | (-0.09, 0.10) | 0.01  | (-0.12, 0.13) | 0.17  | (0.08, 0.26)  | 29.75             | 8.26                  | 0.27 a         |
| <b>Alkylmethoxyphenols</b>           | 0.60  | (0.51, 0.68)  | 0.60  | (0.52, 0.68)  | 0.45  | (0.37, 0.53)  | 47.11             | 3.31                  | 0.61 a         |
| <b>Alkylphenols</b>                  | 0.26  | (0.14, 0.37)  | 0.26  | (0.14, 0.37)  | 0.32  | (0.23, 0.41)  | 39.26             | 3.31                  | 0.46 a         |

ICC-C: Intraclass correlation coefficient-Consistency model: when systematic difference between FFQ and 7-day food record estimated (poly)phenol intakes were not relevant. ICC-A: Intraclass correlation coefficient-Agreement model: when systematic difference between FFQ and 7-day food record estimated (poly)phenol intakes were relevant. Kappa: Weighted kappa coefficient (linear weights). 95% CI: 95% confidence interval. a:  $p < 0.001$ . \*: There was no reported value from FFQ for hydroxyphenylpropanoic acids, so only agreement on the absolute estimated values was assessed.



**Supplementary Table 6. Agreements between total (poly)phenol intake and total phenolic metabolite levels in urine and plasma in participants with plausible reported energy intakes (n=111 and 103, respectively)**

| metabolite levels | questionnaires | groups              | Kappa         | (95% CI)       | same quartile (%) | opposite quartile (%) |
|-------------------|----------------|---------------------|---------------|----------------|-------------------|-----------------------|
| Urine<br>(n=111)  | FFQ            | total (poly)phenols | 0.05          | (-0.09, 0.18)  | 23.64             | 5.45                  |
|                   |                | total flavonoids    | 0.12          | (-0.03, 0.26)  | 24.32             | 3.60                  |
|                   |                | flavonols           | 0.18          | (0.05, 0.31)   | 31.53             | 6.31                  |
|                   |                | flavanones          | 0.12          | (-0.01, 0.25)  | 27.93             | 8.11                  |
|                   |                | isoflavonoids       | 0.00          | (-0.13, 0.13)  | 21.62             | 9.01                  |
|                   |                | total lignans       | 0.12          | (-0.02, 0.25)  | 29.73             | 8.11                  |
|                   |                | total stilbenes     | 0.10          | (-0.03, 0.24)  | 27.93             | 7.21                  |
|                   |                | tyrosols            | 0.03          | (-0.09, 0.16)  | 21.62             | 7.21                  |
|                   | 7DD            | total (poly)phenols | 0.00          | (-0.13, 0.13)  | 26.06             | 3.64                  |
|                   |                | total flavonoids    | 0.02          | (-0.12, 0.15)  | 24.32             | 8.11                  |
|                   |                | flavonols           | -0.10         | (-0.23, 0.03)  | 20.72             | 14.41                 |
|                   |                | flavanones          | 0.15          | (0.01, 0.29)   | 34.23             | 9.01                  |
|                   |                | isoflavonoids       | 0.07          | (-0.06, 0.21)  | 26.13             | 10.81                 |
|                   |                | total lignans       | 0.00          | (-0.13, 0.13)  | 23.42             | 11.71                 |
| total stilbenes   |                | 0.00                | (-0.13, 0.14) | 21.62          | 9.01              |                       |
| tyrosols          |                | 0.03                | (-0.10, 0.16) | 23.42          | 12.61             |                       |
| Plasma<br>(n=103) | FFQ            | total (poly)phenols | 0.17          | (0.03, 0.32)   | 30.00             | 10.67                 |
|                   |                | total flavonoids    | 0.02          | (-0.12, 0.16)  | 36.89             | 9.71                  |
|                   |                | flavonols           | 0.00          | (-0.13, 0.14)  | 23.30             | 12.62                 |
|                   |                | flavanones          | -0.01         | (-0.15, 0.12)  | 23.30             | 10.68                 |
|                   |                | isoflavonoids       | 0.00          | (-0.14, 0.15)  | 25.24             | 11.65                 |
|                   |                | total lignans       | 0.03          | (-0.10, 0.17)  | 25.24             | 10.68                 |
|                   |                | total stilbenes     | 0.00          | (-0.13, 0.14)  | 25.24             | 10.68                 |
|                   |                | tyrosols            | -0.04         | (-0.19, 0.10)  | 29.13             | 14.56                 |
|                   | 7DD            | total (poly)phenols | 0.11          | (-0.03, 0.25)  | 30.67             | 9.33                  |
|                   |                | total flavonoids    | 0.05          | (-0.09, 0.19)  | 28.16             | 10.68                 |
|                   |                | flavonols           | -0.14         | (-0.27, -0.01) | 21.36             | 17.48                 |
|                   |                | flavanones          | -0.03         | (-0.17, 0.11)  | 23.30             | 9.71                  |
|                   |                | isoflavonoids       | 0.11          | (-0.03, 0.26)  | 32.04             | 8.74                  |
|                   |                | total lignans       | 0.06          | (-0.08, 0.21)  | 33.98             | 11.65                 |
| total stilbenes   |                | 0.00                | (-0.14, 0.15) | 27.18          | 12.62             |                       |
| tyrosols          |                | -0.01               | (-0.16, 0.13) | 29.13          | 17.48             |                       |

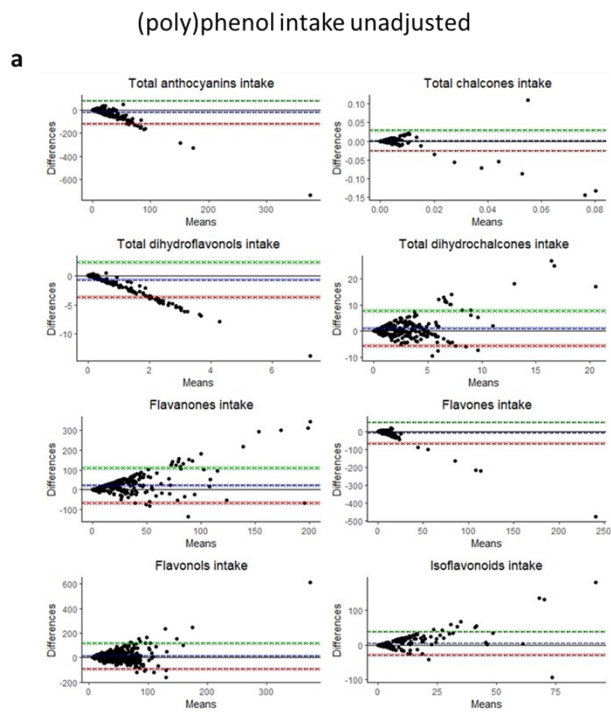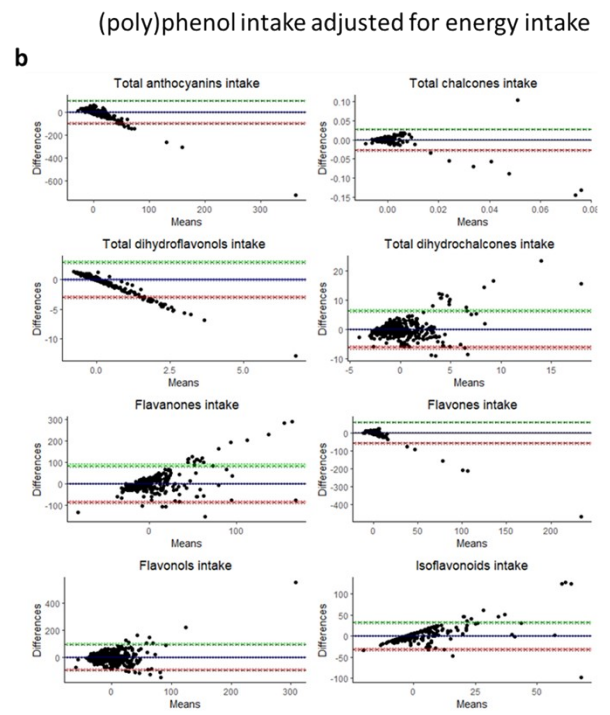

**Supplementary figure 1. Bland-Altman plots on estimated flavonoids subclass intake by FFQ and 7-day food diary**

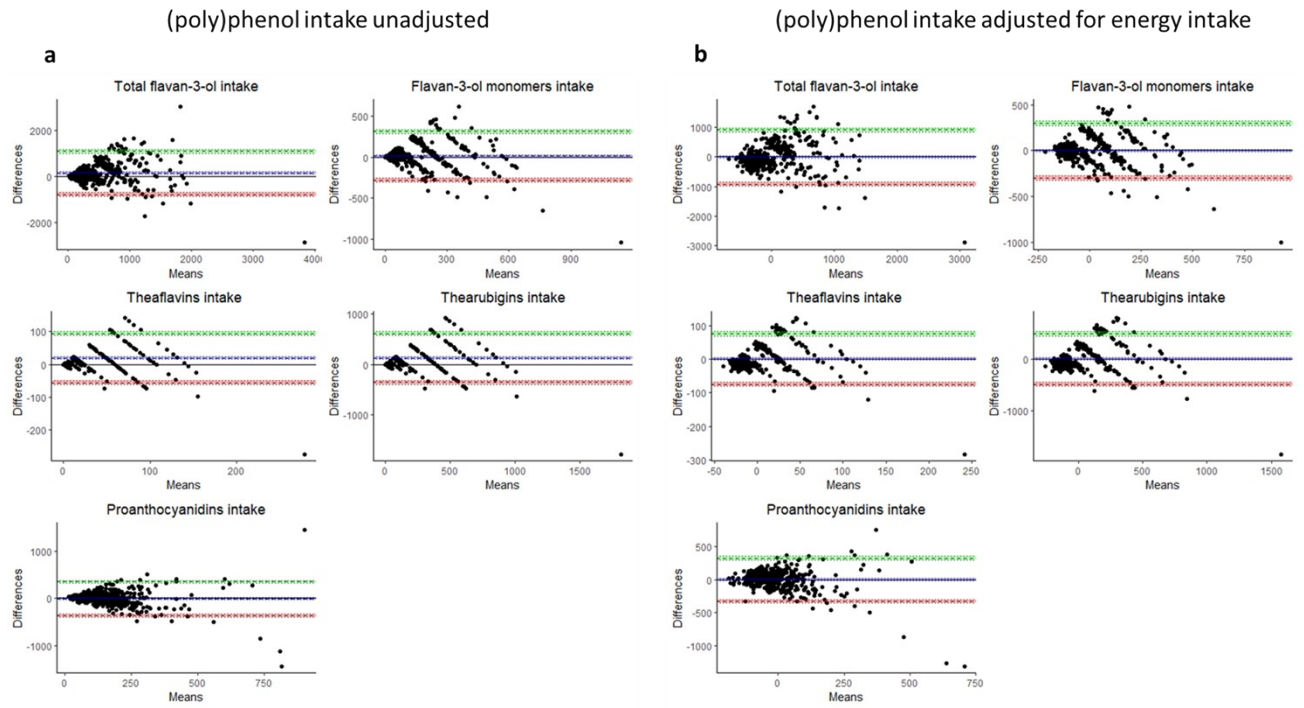

**Supplementary figure 2. Bland-Altman plots on estimated flavan-3-ols intake by FFQ and 7-day food diary**

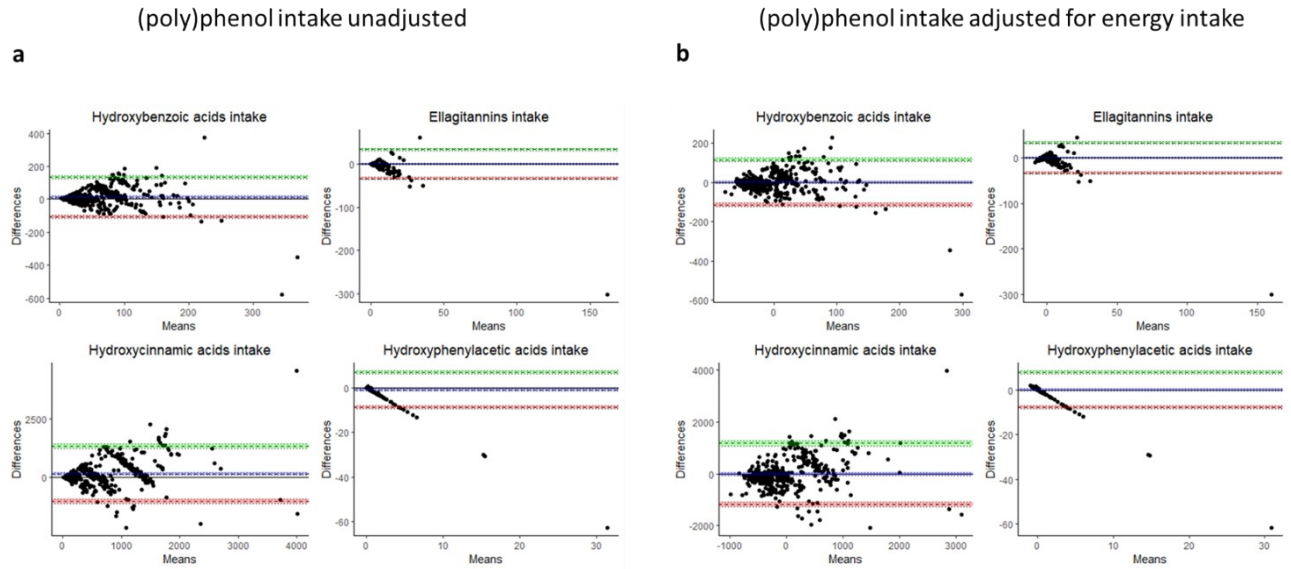

**Supplementary figure 3. Bland-Altman plots on estimated phenolic acids intake by FFQ and 7-day food diary**

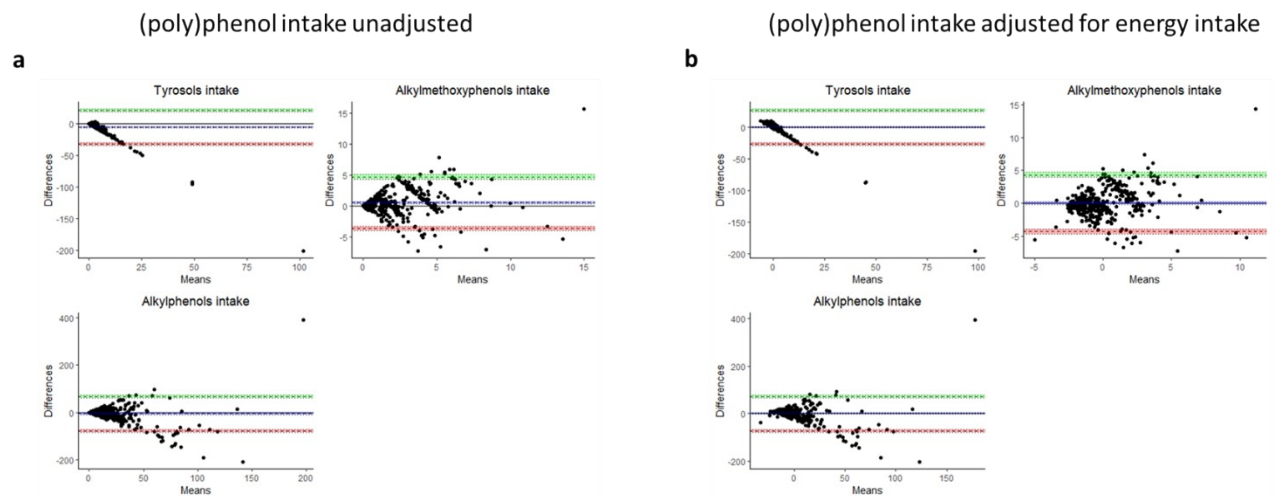

**Supplementary figure 4. Bland-Altman plots on estimated other (poly)phenols intake by FFQ and 7-day food diary**

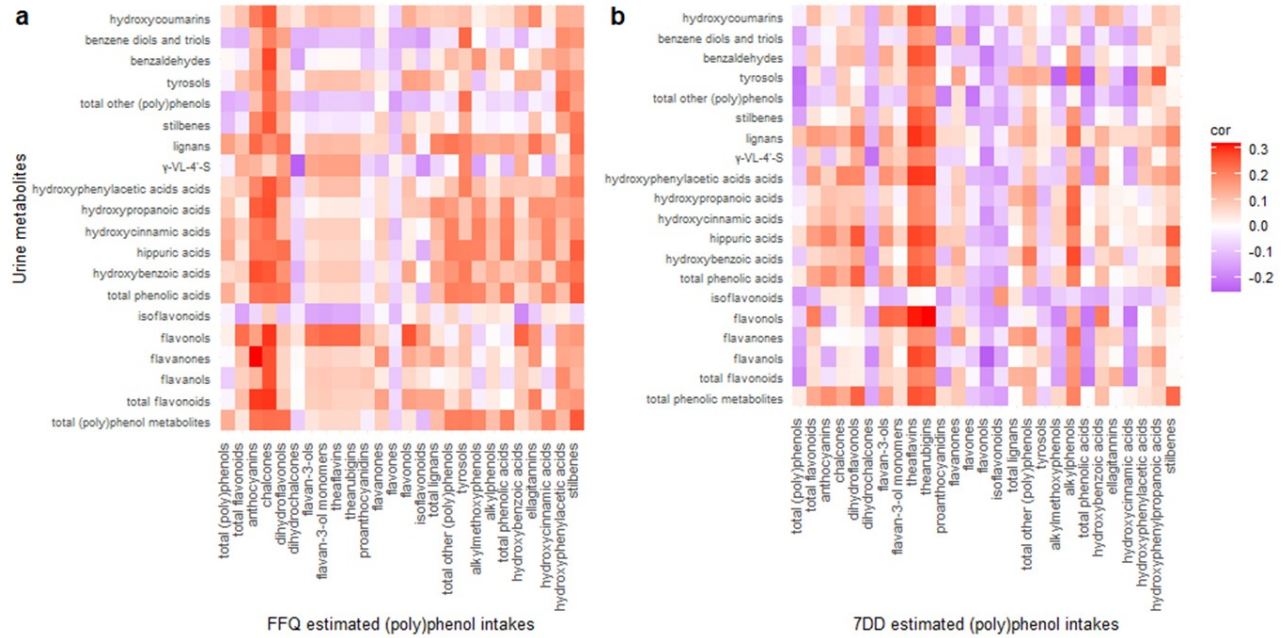

**Supplementary figure 5. Correlation heatmap between total urinary phenolic metabolites and estimated (poly)phenol intakes from FFQ and 7DD (figure a, figure b) adjusted for energy intake in participants with plausible reported energy intake**

Available urine n=111. FFQ: food frequency questionnaire; 7DD: 7-day food diary; γ-VL-4's: (4R)-5-(3',4'-dihydroxyphenyl)-γ-valerolactone-4'-sulfate.

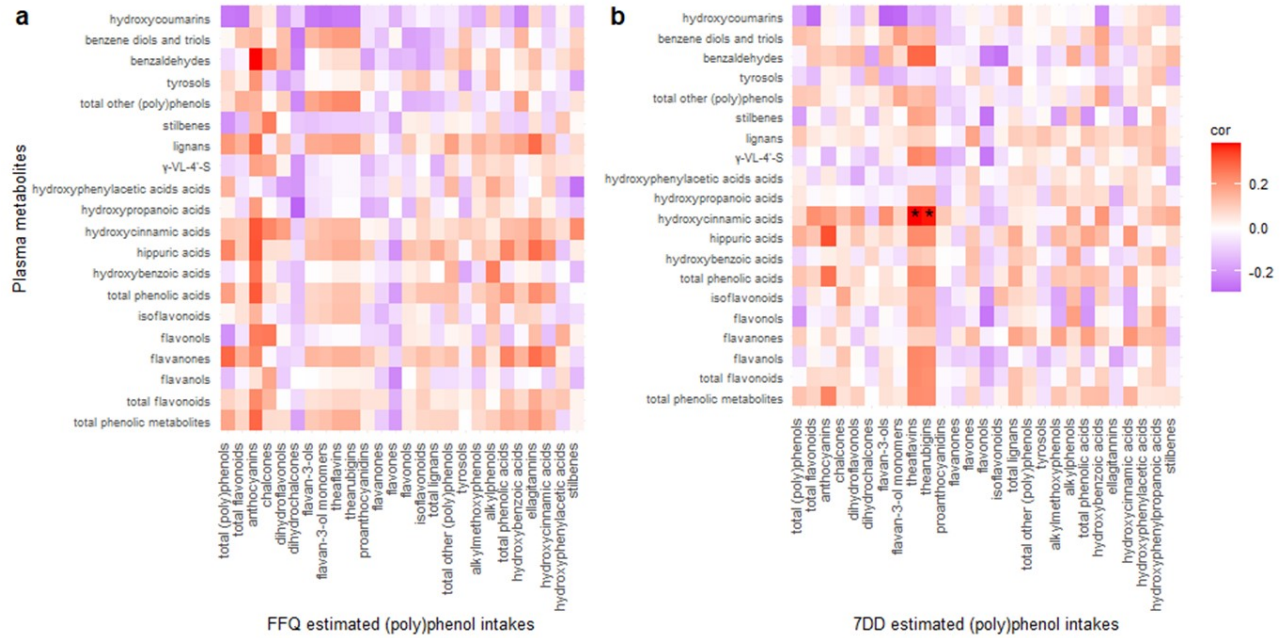

**Supplementary figure 6. Correlation heatmap between total plasma phenolic metabolites and estimated (poly)phenol intakes from FFQ and 7DD (figure a, figure b) adjusted for energy intake in participants with plausible reported energy intake**

Available plasma n=103. FFQ: food frequency questionnaire; 7DD: 7-day food diary;  $\gamma$ -VL-4's: (4R)-5-(3',4'-dihydroxyphenyl)- $\gamma$ -valerolactone-4'-sulfate.
